# Supplementary material
Source: PubMed Central journal article supplement (PMC3059399)
Supplement: NIHMS269273-supplement-2.pdf [file NIHMS269273-supplement-2.pdf]

# Supplementary Figure S1: T $\beta$ RI/II blockade inhibits and reverses squamous carcinoma EMT *in vitro*.

## A Squamous E4 cells

|                      |   |   |   |     |   |    |
|----------------------|---|---|---|-----|---|----|
| TGF $\beta$ 1        | - | + | + | +   | + | +  |
| DMSO                 | - | - | + |     |   |    |
| LY2109761 ( $\mu$ M) | - | - | - | 0.2 | 2 | 20 |

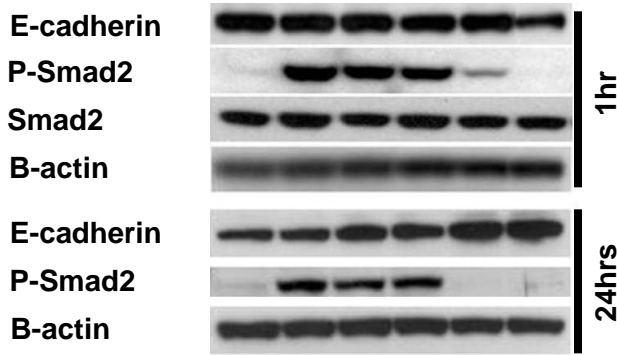

## B TGF $\beta$ -induced spindle E4 cells

|                      |   |   |   |     |   |    |
|----------------------|---|---|---|-----|---|----|
| TGF $\beta$ 1        | - | + | + | +   | + | +  |
| DMSO                 | - | - | + |     |   |    |
| LY2109761 ( $\mu$ M) | - | - | - | 0.2 | 2 | 20 |

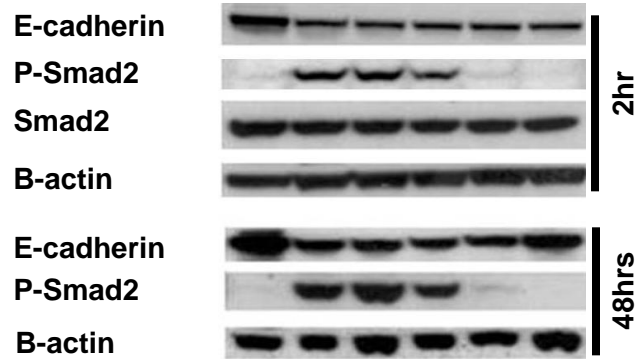

## C

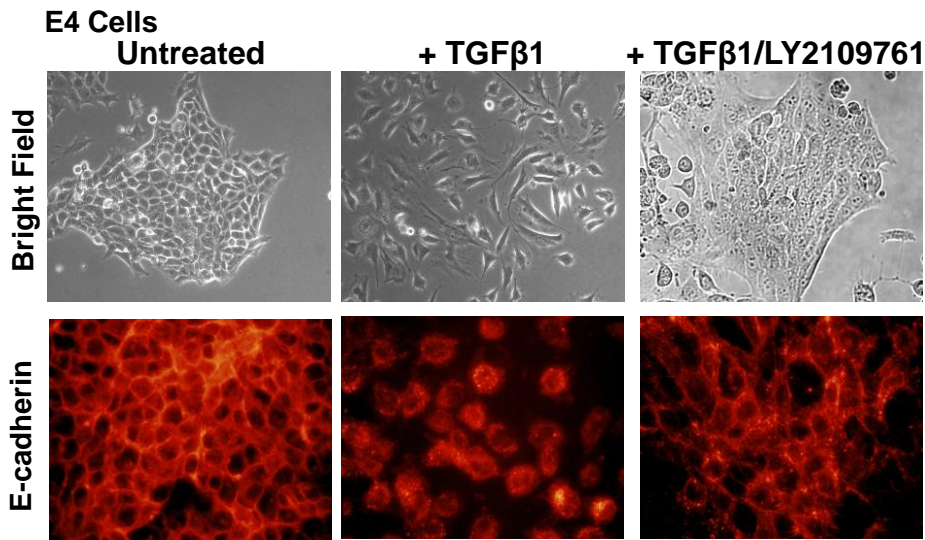

## D D3 Cells

|                      |   |   |     |   |    |
|----------------------|---|---|-----|---|----|
| DMSO                 | - | + |     |   |    |
| LY2109761 ( $\mu$ M) | - | - | 0.2 | 2 | 20 |

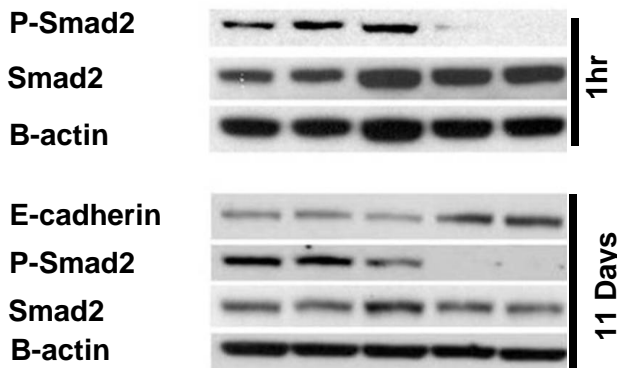

## E H11 Cells

|                      |   |   |     |   |    |
|----------------------|---|---|-----|---|----|
| DMSO                 | - | + |     |   |    |
| LY2109761 ( $\mu$ M) | - | - | 0.2 | 2 | 20 |

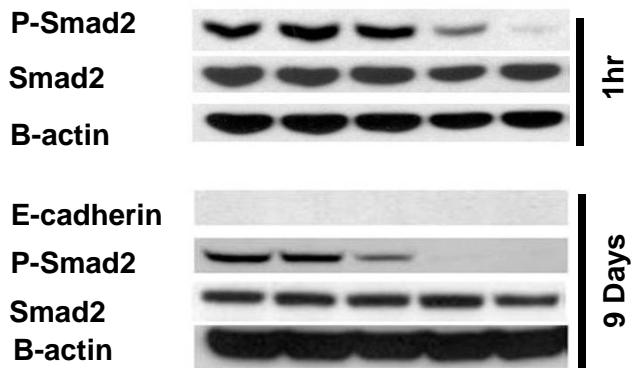

# Supplementary Figure S2: TGF- $\beta$ pathway inhibition increases papilloma incidence.

A

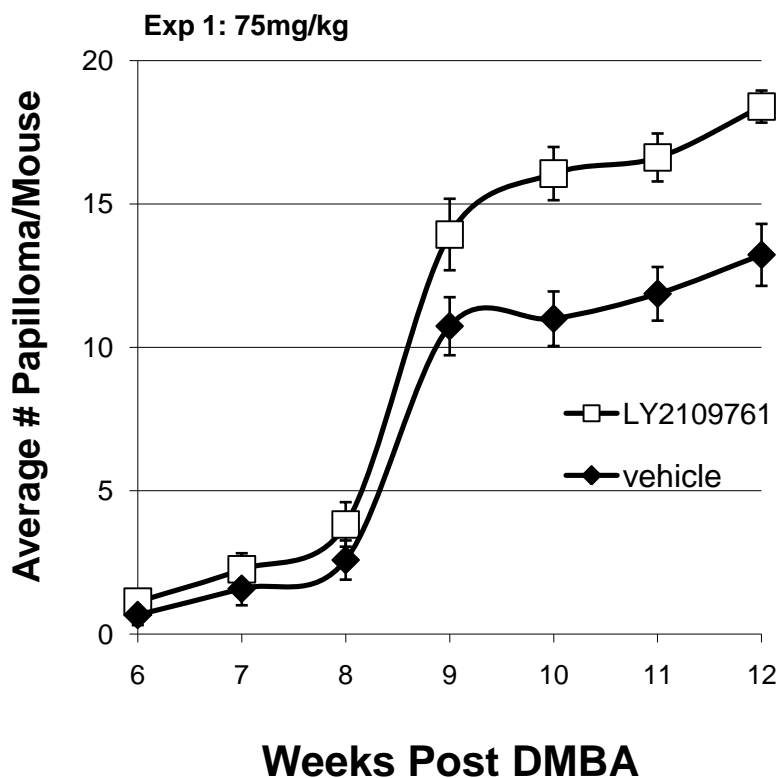

B

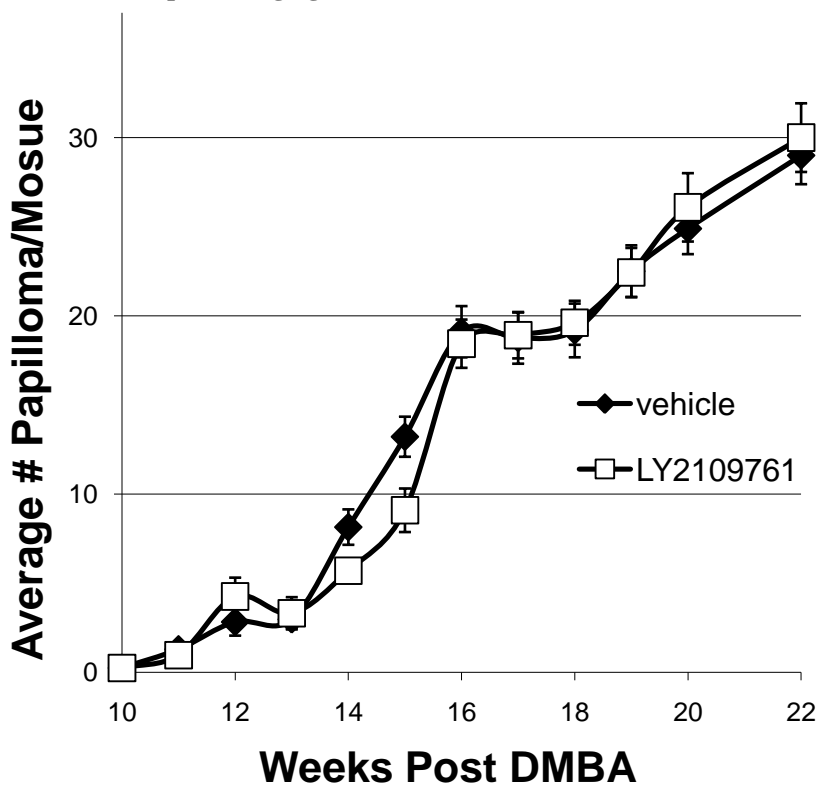

# Supplementary Figure S3: Papilloma stroma shows an increase in CD45+ cells after Sustained TGF-β signaling suppression

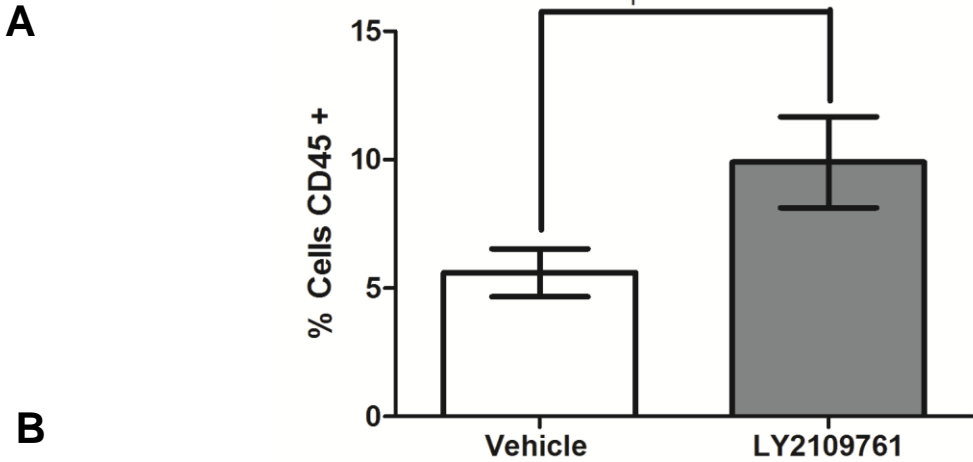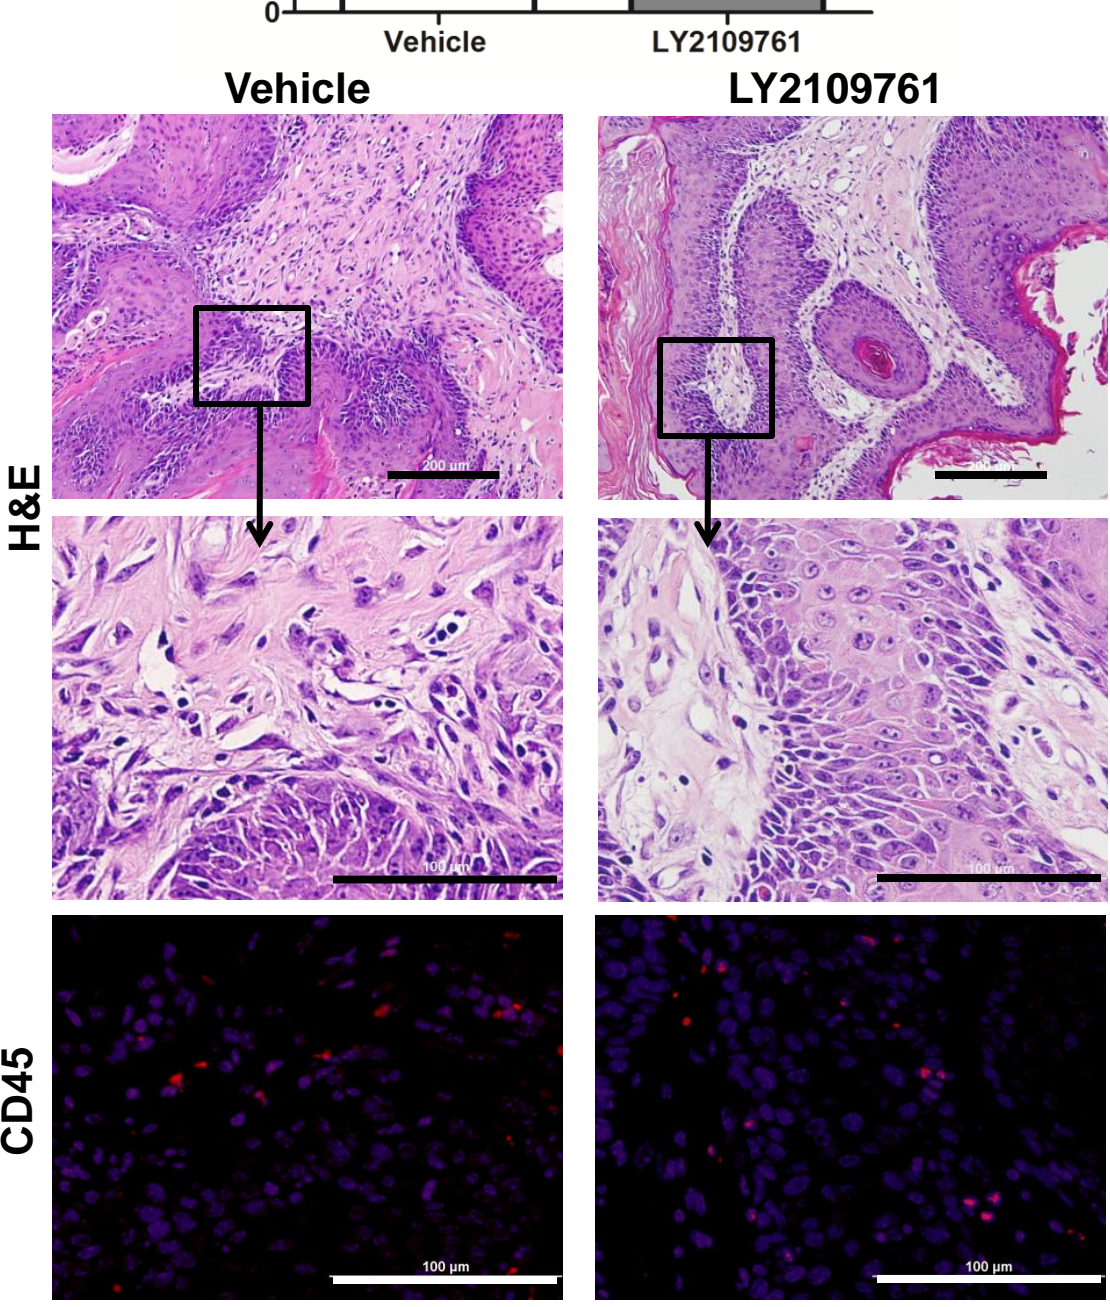

# Supplementary Figure S4: Sustained suppression of TGF- $\beta$ signaling lead to an outgrowth of drug resistant cells

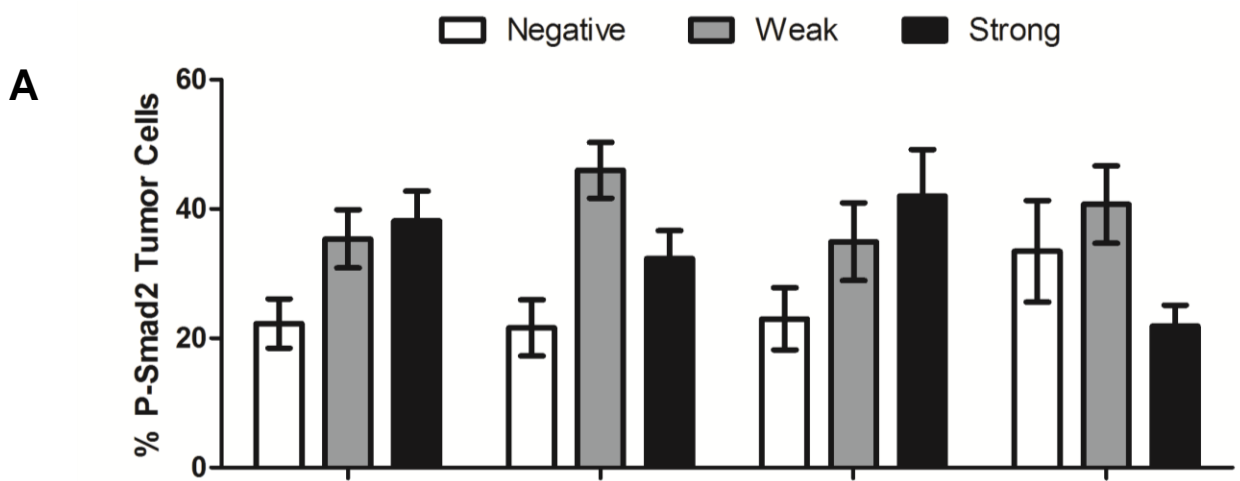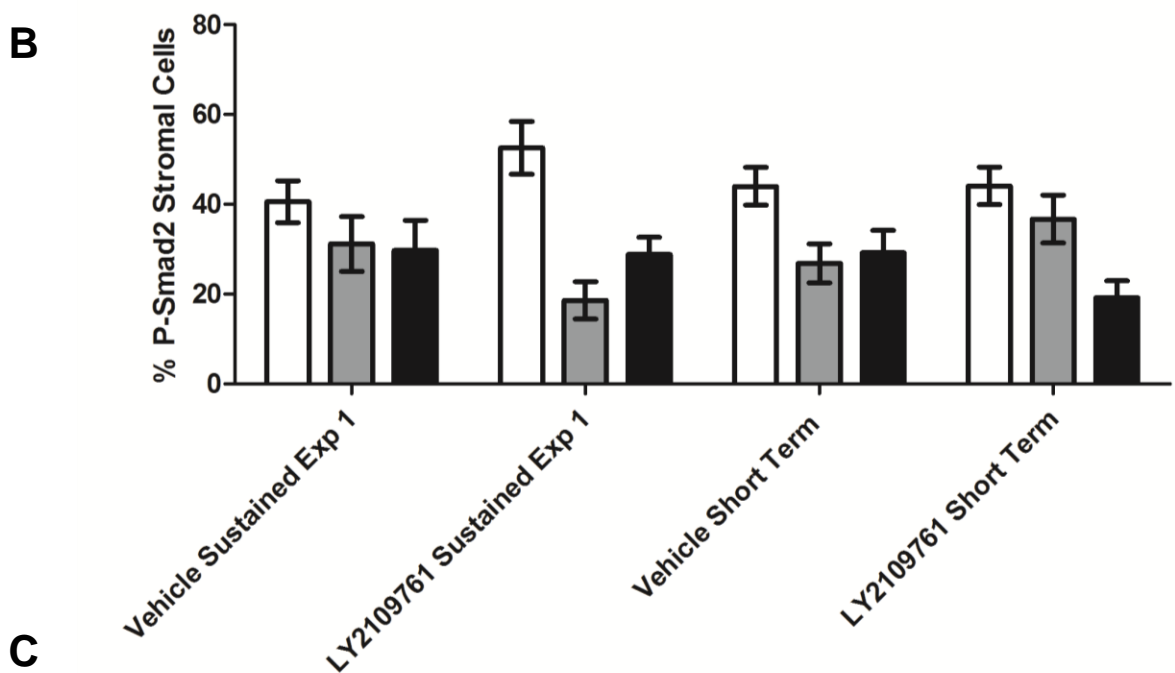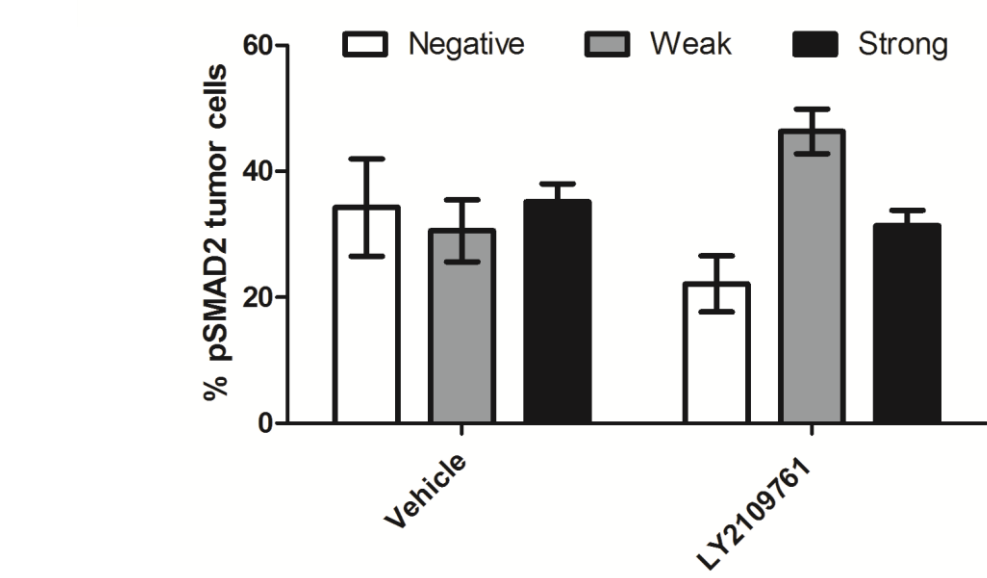

# Supplementary Figure S5 : The paradoxical increase of P-Smad2 in Sustained LY2109761 treated tumors is not due to a rebound effect on TGF- $\beta$ signaling

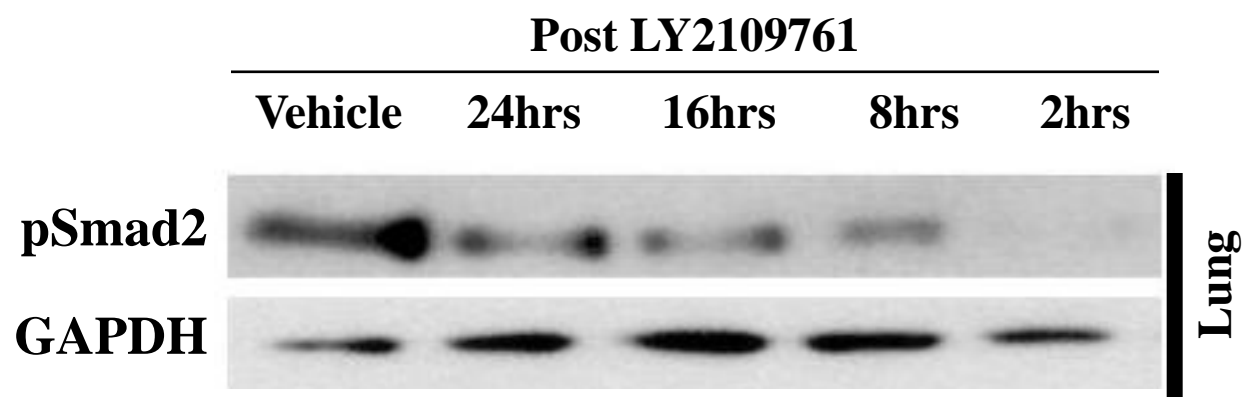

# Supplementary Figure S6: :Reduced P-Smad2 response to LY2109761 in papillomas after Short Term but not Sustained drug treatment

**A**

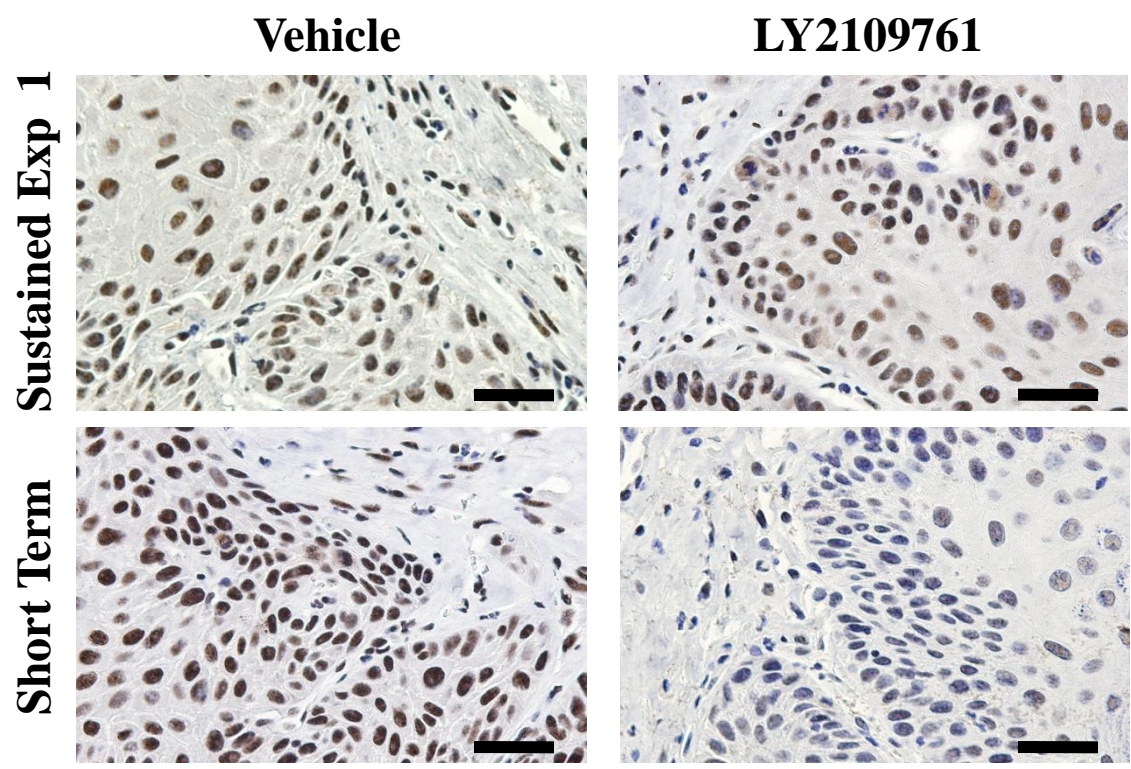

**B**

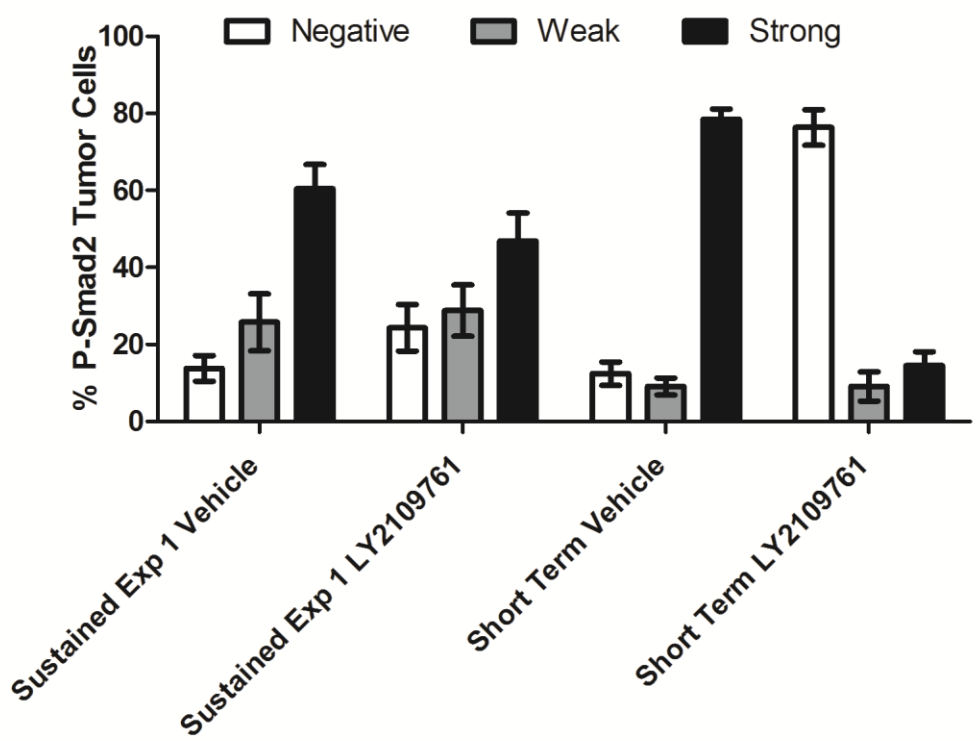

**Supplementary Table S1: No effect of TGF- $\beta$  pathway inhibition on carcinoma incidence or malignant conversion rate.**

|                         |           | # Mice | # Carcinomas | # Papillomas   | Ratio<br>Papillomas/Carcinomas |
|-------------------------|-----------|--------|--------------|----------------|--------------------------------|
| <b>Exp 1</b><br>75mg/Kg | LY2109761 | 11     | 5            | 229            | 45.80                          |
|                         | Vehicle   | 20     | 12           | 307            | 25.58                          |
| <b>Exp 2</b>            |           |        |              |                |                                |
| 75mg/Kg                 | LY2109761 | 23     | 30           | 600            | 20.00                          |
|                         | Vehicle   | 28     | 37           | 695            | 18.78                          |
| <b>Exp 3</b>            |           |        |              |                |                                |
| 100mg/Kg                | LY2109761 | 28     | 33           | 983            | 29.79                          |
|                         | Vehicle   | 24     | 25           | 720            | 28.80                          |
|                         |           |        |              | <b>Average</b> |                                |
|                         |           |        |              | LY2109761      | 31.86                          |
|                         |           |        |              | Vehicle        | 24.39                          |

**Supplementary Table S2: No effect of LY2109761 on spindle versus squamous ratio of chemically-induced carcinoma**

| <b>Sustained</b> |           | <b>Squamous</b> | <b>Spindle</b> |
|------------------|-----------|-----------------|----------------|
| Exp. 1           | Vehicle   | 15              | 0              |
|                  | LY2109761 | 24              | 0              |
| Exp. 2           | Vehicle   | 28              | 14             |
|                  | LY2109761 | 13              | 8              |



**Supplemental Table 3: Differential carcinoma gene expression profiles between two different drug regimens of LY2109761**

| Gene Name                                                | Fold Change                      |      |                                            |      | Fold Difference in expression level between different groups |                        |                      |                         |
|----------------------------------------------------------|----------------------------------|------|--------------------------------------------|------|--------------------------------------------------------------|------------------------|----------------------|-------------------------|
|                                                          | Sustained Drug / Short Term Drug |      | Sustained Drug / Short Term Drug / Vehicle |      | Mean Sustained Drug                                          | Mean Sustained Vehicle | Mean Short Term Drug | Mean Short Term Vehicle |
|                                                          | Q vaule                          |      |                                            |      | Drug                                                         | Vehicle                | Drug                 | Vehicle                 |
| <b>Genes up regulated after Sustained Drug Treatment</b> |                                  |      |                                            |      |                                                              |                        |                      |                         |
| Jam2                                                     | 6.58                             | 0    | 3.58                                       | 0.65 | 8.902                                                        | 7.064                  | 5.918                | 6.537                   |
| Mmp13                                                    | 6.56                             | 2.22 | 4.00                                       | 0.52 | 11.96                                                        | 9.959                  | 9.248                | 10.2                    |
| Sox11                                                    | 6.08                             | 6.61 | 6.82                                       | 0.79 | 9.834                                                        | 7.064                  | 7.23                 | 7.57                    |
| 6030455K13Rik                                            | 5.97                             | 2.22 | 1.59                                       | 1.16 | 9.095                                                        | 8.423                  | 6.548                | 6.334                   |
| Mmp3                                                     | 5.76                             | 0    | 3.41                                       | 0.88 | 12.05                                                        | 10.28                  | 9.524                | 9.706                   |
| Pcolce2                                                  | 5.73                             | 0    | 3.78                                       | 0.77 | 9.15                                                         | 7.232                  | 6.917                | 7.294                   |
| 9230105E05Rik                                            | 5.22                             | 2.22 | 1.62                                       | 0.77 | 8.831                                                        | 8.132                  | 6.528                | 6.897                   |
| Krt18                                                    | 5.14                             | 3.61 | 3.64                                       | 1.14 | 11.68                                                        | 9.818                  | 9.322                | 9.132                   |
| Mmp13                                                    | 4.79                             | 2.22 | 3.18                                       | 0.50 | 15.23                                                        | 13.56                  | 12.97                | 13.98                   |
| A530045L16Rik                                            | 4.68                             | 6.61 | 3.63                                       | 0.88 | 9.492                                                        | 7.632                  | 7.266                | 7.458                   |
| Mmp3                                                     | 4.52                             | 2.22 | 2.81                                       | 0.72 | 13.01                                                        | 11.52                  | 10.83                | 11.31                   |
| Jam2                                                     | 4.51                             | 8.62 | 5.41                                       | 0.67 | 9.397                                                        | 6.962                  | 6.718                | 7.298                   |
| Mmp10                                                    | 4.4                              | 0    | 2.44                                       | 0.38 | 12.18                                                        | 10.89                  | 10.04                | 11.44                   |
| Mmp9                                                     | 4.35                             | 6.61 | 3.73                                       | 0.43 | 13.42                                                        | 11.52                  | 11.3                 | 12.51                   |
| Ccl3                                                     | 4.02                             | 6.61 | 4.03                                       | 0.93 | 11.73                                                        | 9.721                  | 9.727                | 9.832                   |
| Il23a                                                    | 4.01                             | 0    | 1.62                                       | 1.00 | 9.066                                                        | 8.366                  | 7.063                | 7.063                   |
| Pcyt1b                                                   | 4                                | 6.61 | 2.50                                       | 0.75 | 8.105                                                        | 6.783                  | 6.107                | 6.528                   |
| Ffar2                                                    | 4                                | 0    | 3.06                                       | 0.80 | 9.47                                                         | 7.857                  | 7.471                | 7.792                   |
| Cd274                                                    | 3.9                              | 6.61 | 3.64                                       | 0.91 | 11.6                                                         | 9.736                  | 9.638                | 9.774                   |
| Ccl4                                                     | 3.75                             | 7.71 | 4.13                                       | 0.66 | 9.884                                                        | 7.837                  | 7.976                | 8.574                   |
| Lamc2                                                    | 3.68                             | 0    | 2.35                                       | 0.84 | 12.86                                                        | 11.63                  | 10.99                | 11.24                   |
| G630056H24Rik                                            | 3.66                             | 6.61 | 1.70                                       | 0.87 | 8.811                                                        | 8.043                  | 6.94                 | 7.144                   |
| Lamc2                                                    | 3.62                             | 2.22 | 2.82                                       | 0.91 | 10.32                                                        | 8.824                  | 8.466                | 8.596                   |
| Lamc2                                                    | 3.6                              | 2.22 | 3.29                                       | 0.88 | 10.73                                                        | 9.013                  | 8.877                | 9.069                   |
| Lamb3                                                    | 3.59                             | 0    | 1.97                                       | 0.77 | 14.37                                                        | 13.39                  | 12.52                | 12.9                    |
| Adcy7                                                    | 3.58                             | 0    | 2.29                                       | 0.63 | 8.615                                                        | 7.417                  | 6.777                | 7.436                   |
| Plau                                                     | 3.55                             | 6.61 | 1.91                                       | 1.30 | 13.03                                                        | 12.1                   | 11.21                | 10.83                   |
| A430042E23Rik                                            | 3.43                             | 0    | 4.29                                       | 0.91 | 8.48                                                         | 6.38                   | 6.73                 | 6.867                   |
| Lamc2                                                    | 3.4                              | 3.61 | 1.88                                       | 0.65 | 9.989                                                        | 9.082                  | 8.222                | 8.849                   |
| Timp1                                                    | 3.36                             | 6.61 | 2.68                                       | 1.01 | 12.89                                                        | 11.47                  | 11.14                | 11.13                   |
| Msx1                                                     | 3.24                             | 2.22 | 1.48                                       | 0.60 | 8.487                                                        | 7.919                  | 6.793                | 7.518                   |
| Tnnt2                                                    | 3.22                             | 6.61 | 2.79                                       | 0.85 | 12.17                                                        | 10.69                  | 10.48                | 10.71                   |
| 4933412E12Rik                                            | 3.19                             | 3.61 | 1.95                                       | 0.63 | 7.664                                                        | 6.703                  | 5.992                | 6.661                   |
| Lama3                                                    | 3.18                             | 0    | 1.78                                       | 0.75 | 12.82                                                        | 11.99                  | 11.15                | 11.57                   |
| Ccl4                                                     | 3.09                             | 6.61 | 3.20                                       | 0.84 | 12.83                                                        | 11.15                  | 11.21                | 11.47                   |
| Ltbp2                                                    | 3.09                             | 2.22 | 1.83                                       | 0.50 | 11.62                                                        | 10.75                  | 9.996                | 11                      |
| Hvcn1                                                    | 3.05                             | 6.61 | 2.51                                       | 0.79 | 8.933                                                        | 7.604                  | 7.325                | 7.659                   |
| LOC385114                                                | 3.02                             | 9.7  | 2.77                                       | 0.68 | 9.238                                                        | 7.77                   | 7.645                | 8.201                   |
| Cd44                                                     | 3                                | 7.71 | 1.35                                       | 0.76 | 9.755                                                        | 9.326                  | 8.171                | 8.574                   |
| Lrp11                                                    | 2.96                             | 7.71 | 2.33                                       | 0.73 | 9.574                                                        | 8.353                  | 8.009                | 8.456                   |
| Prkg2                                                    | 2.94                             | 2.22 | 2.58                                       | 1.78 | 13.54                                                        | 12.17                  | 11.98                | 11.15                   |
| 9430052C07Rik                                            | 2.92                             | 0    | 1.84                                       | 1.08 | 8.682                                                        | 7.799                  | 7.196                | 7.086                   |
| 5830467P10Rik                                            | 2.91                             | 3.61 | 2.04                                       | 0.78 | 12.13                                                        | 11.1                   | 10.59                | 10.94                   |

# Supplementary Table S3 Continued 1

|                |             |      |      |      |       |       |       |       |
|----------------|-------------|------|------|------|-------|-------|-------|-------|
| scf0015365.1_6 | <b>2.9</b>  | 8.62 | 2.34 | 0.89 | 9.844 | 8.62  | 8.309 | 8.472 |
| Afap1          | <b>2.89</b> | 6.61 | 1.64 | 0.86 | 12.01 | 11.3  | 10.48 | 10.7  |
| AI504432       | <b>2.8</b>  | 0    | 1.86 | 0.39 | 7.726 | 6.834 | 6.276 | 7.65  |
| C530043K16Rik  | <b>2.79</b> | 9.7  | 1.52 | 0.69 | 10.2  | 9.593 | 8.721 | 9.254 |
| Angptl2        | <b>2.78</b> | 2.22 | 2.04 | 0.86 | 9.592 | 8.565 | 8.115 | 8.337 |
| D230048P18Rik  | <b>2.77</b> | 9.7  | 1.78 | 0.63 | 10.28 | 9.445 | 8.807 | 9.485 |
| 3010031K01Rik  | <b>2.76</b> | 6.61 | 1.37 | 0.93 | 9.844 | 9.395 | 8.381 | 8.479 |
| Garnl3         | <b>2.7</b>  | 0    | 2.02 | 0.65 | 7.26  | 6.244 | 5.625 | 6.254 |
| Prrx1          | <b>2.68</b> | 3.61 | 1.70 | 0.88 | 9.826 | 9.058 | 8.403 | 8.584 |
| Apbb2          | <b>2.67</b> | 3.61 | 1.39 | 0.91 | 7.834 | 7.355 | 6.46  | 6.596 |
| LOC668631      | <b>2.66</b> | 8.62 | 1.73 | 0.75 | 11.74 | 10.95 | 10.33 | 10.75 |
| LOC100046817   | <b>2.63</b> | 6.61 | 1.65 | 1.36 | 9.568 | 8.847 | 8.172 | 7.726 |
| 9530081N05Rik  | <b>2.62</b> | 6.61 | 1.59 | 0.55 | 7.804 | 7.131 | 6.416 | 7.27  |
| E030018N11Rik  | <b>2.58</b> | 2.22 | 1.46 | 0.97 | 11.88 | 11.33 | 10.51 | 10.55 |
| Ccl7           | <b>2.54</b> | 2.22 | 1.96 | 1.05 | 11.52 | 10.55 | 10.18 | 10.11 |
| Gne            | <b>2.51</b> | 7.71 | 1.63 | 0.57 | 8.377 | 7.675 | 7.051 | 7.864 |
| Msn            | <b>2.5</b>  | 6.61 | 1.43 | 0.69 | 7.731 | 7.211 | 6.407 | 6.939 |
| LOC100047480   | <b>2.48</b> | 6.61 | 2.18 | 0.73 | 7.319 | 6.197 | 6.011 | 6.472 |
| 6330522J23Rik  | <b>2.47</b> | 7.71 | 0.99 | 1.08 | 9.453 | 9.468 | 8.151 | 8.038 |
| Pde4dip        | <b>2.42</b> | 3.61 | 1.93 | 0.75 | 9.955 | 9.01  | 8.68  | 9.095 |
| Prrx1          | <b>2.42</b> | 2.22 | 1.56 | 0.70 | 9.413 | 8.776 | 8.141 | 8.65  |
| Cd40           | <b>2.41</b> | 2.22 | 1.88 | 0.64 | 7.624 | 6.716 | 6.357 | 6.992 |
| D030049N18Rik  | <b>2.39</b> | 6.61 | 1.29 | 0.85 | 8.648 | 8.276 | 7.394 | 7.636 |
| Emp3           | <b>2.38</b> | 2.22 | 2.43 | 1.22 | 11.59 | 10.31 | 10.34 | 10.05 |
| Ccnd1          | <b>2.35</b> | 6.61 | 1.40 | 1.48 | 13.98 | 13.49 | 12.75 | 12.18 |
| Itgb1          | <b>2.35</b> | 2.22 | 1.47 | 1.20 | 11.72 | 11.16 | 10.49 | 10.23 |
| D830031G23Rik  | <b>2.34</b> | 6.61 | 1.51 | 0.98 | 8.377 | 7.78  | 7.152 | 7.178 |
| 5830411K21Rik  | <b>2.33</b> | 8.32 | 1.66 | 0.77 | 7.932 | 7.201 | 6.712 | 7.081 |
| Hist1h2ae      | <b>2.33</b> | 6.61 | 1.22 | 1.13 | 11.64 | 11.35 | 10.42 | 10.25 |
| C130035G06Rik  | <b>2.33</b> | 6.61 | 2.62 | 1.08 | 7.691 | 6.301 | 6.446 | 6.331 |
| Emp3           | <b>2.33</b> | 3.61 | 2.10 | 0.86 | 13.47 | 12.4  | 12.25 | 12.47 |
| Ptpn12         | <b>2.28</b> | 9.7  | 1.63 | 0.95 | 8.018 | 7.314 | 6.827 | 6.902 |
| Otud4          | <b>2.28</b> | 8.62 | 1.27 | 0.92 | 8.539 | 8.198 | 7.353 | 7.478 |
| 4930442M18Rik  | <b>2.28</b> | 6.61 | 1.90 | 0.94 | 7.514 | 6.586 | 6.327 | 6.422 |
| Gdnf           | <b>2.26</b> | 8.32 | 1.21 | 0.80 | 9.586 | 9.311 | 8.411 | 8.735 |
| Prss12         | <b>2.25</b> | 6.61 | 2.24 | 0.96 | 8.519 | 7.356 | 7.345 | 7.401 |
| Nt5e           | <b>2.24</b> | 9.7  | 1.77 | 0.76 | 10.11 | 9.289 | 8.943 | 9.348 |
| A630097D09Rik  | <b>2.24</b> | 6.61 | 1.45 | 0.80 | 9.287 | 8.755 | 8.126 | 8.452 |
| 4833425P12Rik  | <b>2.24</b> | 6.61 | 1.44 | 0.82 | 9.655 | 9.133 | 8.494 | 8.786 |
| Tnfrsf12a      | <b>2.24</b> | 3.61 | 1.57 | 1.18 | 13.09 | 12.44 | 11.93 | 11.69 |
| LOC382691      | <b>2.22</b> | 6.61 | 1.53 | 0.99 | 10.04 | 9.425 | 8.892 | 8.909 |
| Gpr109a        | <b>2.21</b> | 7.71 | 2.19 | 0.82 | 12.25 | 11.12 | 11.1  | 11.39 |
| EG245297       | <b>2.19</b> | 6.61 | 1.53 | 0.97 | 9.907 | 9.294 | 8.775 | 8.813 |
| A730027B03Rik  | <b>2.18</b> | 3.61 | 2.23 | 0.72 | 7.236 | 6.082 | 6.109 | 6.58  |
| Ubr2           | <b>2.18</b> | 0    | 1.18 | 0.87 | 8.59  | 8.353 | 7.464 | 7.665 |
| Gstt2          | <b>2.17</b> | 7.71 | 1.63 | 0.60 | 7.534 | 6.827 | 6.417 | 7.147 |
| 4833441J24Rik  | <b>2.16</b> | 8.62 | 1.06 | 0.94 | 7.425 | 7.335 | 6.317 | 6.408 |
| Snai3          | <b>2.15</b> | 6.61 | 1.42 | 1.35 | 11.75 | 11.24 | 10.64 | 10.21 |
| 2410018L13Rik  | <b>2.14</b> | 6.61 | 1.44 | 1.14 | 8.392 | 7.864 | 7.292 | 7.104 |
| Pkd2           | <b>2.13</b> | 8.62 | 1.55 | 0.82 | 11.67 | 11.04 | 10.58 | 10.87 |
| E030018N11Rik  | <b>2.12</b> | 8.32 | 1.70 | 1.05 | 10.59 | 9.827 | 9.506 | 9.43  |
| 5830401L18Rik  | <b>2.09</b> | 7.71 | 0.85 | 1.01 | 7.258 | 7.493 | 6.258 | 6.25  |
| Ccnd1          | <b>2.09</b> | 6.61 | 1.42 | 1.42 | 12.05 | 11.54 | 10.99 | 10.48 |
| Ch25h          | <b>2.06</b> | 6.61 | 1.90 | 1.12 | 9.234 | 8.308 | 8.193 | 8.033 |

## Supplementary Table S3 Continued 2

|               |      |      |      |      |       |       |       |       |
|---------------|------|------|------|------|-------|-------|-------|-------|
| Lbcl1         | 2.04 | 6.61 | 1.16 | 0.86 | 9.389 | 9.172 | 8.363 | 8.582 |
| Cxcl16        | 2.04 | 6.61 | 1.85 | 0.90 | 11.93 | 11.04 | 10.9  | 11.06 |
| Bmp1          | 2.03 | 6.61 | 1.73 | 0.85 | 11.15 | 10.36 | 10.13 | 10.37 |
| Axl           | 2.02 | 8.62 | 1.56 | 0.77 | 13.5  | 12.86 | 12.49 | 12.86 |
| LOC385644     | 2.01 | 8.32 | 1.18 | 0.73 | 10.28 | 10.04 | 9.273 | 9.735 |
| LOC100047268  | 2.01 | 8.32 | 1.61 | 0.98 | 9.91  | 9.223 | 8.902 | 8.932 |
| Ccnd1         | 2.01 | 6.61 | 1.38 | 1.13 | 15.24 | 14.78 | 14.24 | 14.07 |
| A830080H07Rik | 2.01 | 6.61 | 1.77 | 0.78 | 10.17 | 9.347 | 9.159 | 9.511 |
| Rai14         | 1.99 | 6.61 | 1.56 | 1.12 | 13.2  | 12.56 | 12.21 | 12.05 |
| Rnf213        | 1.98 | 6.61 | 1.31 | 0.93 | 11.92 | 11.53 | 10.94 | 11.05 |
| Itgb1         | 1.95 | 7.71 | 1.38 | 0.77 | 13.89 | 13.43 | 12.92 | 13.29 |
| Twist2        | 1.94 | 9.7  | 1.32 | 0.76 | 10.54 | 10.14 | 9.586 | 9.987 |
| Prss12        | 1.92 | 8.62 | 1.77 | 0.79 | 10.65 | 9.828 | 9.715 | 10.05 |
| Tgif1         | 1.92 | 8.32 | 1.32 | 0.93 | 11.32 | 10.92 | 10.38 | 10.49 |
| Nfat5         | 1.92 | 0    | 1.60 | 0.80 | 8.477 | 7.802 | 7.537 | 7.856 |
| Ccnl          | 1.91 | 7.71 | 1.17 | 1.00 | 11.45 | 11.22 | 10.51 | 10.51 |
| LOC386085     | 1.9  | 7.71 | 1.32 | 1.12 | 7.79  | 7.388 | 6.868 | 6.699 |
| Lat2          | 1.8  | 9.7  | 2.89 | 1.02 | 10.06 | 8.527 | 9.209 | 9.178 |
| Sox18         | 1.77 | 2.22 | 1.20 | 0.66 | 9.966 | 9.703 | 9.143 | 9.747 |
| Enc1          | 1.67 | 8.32 | 1.84 | 0.95 | 10.02 | 9.144 | 9.278 | 9.35  |
| Icam1         | 1.63 | 9.7  | 1.55 | 0.89 | 11.25 | 10.62 | 10.54 | 10.71 |
| Rabgap1l      | 1.63 | 6.61 | 1.34 | 0.95 | 8.208 | 7.788 | 7.502 | 7.581 |
| Tpbp          | 1.6  | 8.62 | 1.26 | 0.95 | 8.159 | 7.821 | 7.481 | 7.56  |
| Trio          | 1.55 | 9.7  |      |      |       |       |       |       |

### Genes down regulated after Sustained Drug Treatment

|               |      |      |      |      |       |       |       |       |
|---------------|------|------|------|------|-------|-------|-------|-------|
| Prss35        | 0.11 | 8.02 | 0.28 | 0.60 | 7.427 | 9.284 | 10.62 | 11.35 |
| Scnn1a        | 0.18 | 2.22 | 0.50 | 1.12 | 7.123 | 8.134 | 9.622 | 9.454 |
| Pcdh21        | 0.2  | 8.02 | 0.20 | 0.72 | 8.483 | 10.81 | 10.77 | 11.24 |
| 2610528A11Rik | 0.22 | 8.02 | 0.34 | 1.04 | 11.59 | 13.15 | 13.77 | 13.71 |
| Rnf43         | 0.23 | 2.22 | 0.20 | 0.99 | 6.76  | 9.052 | 8.862 | 8.878 |
| Tmem45b       | 0.23 | 7.16 | 0.46 | 0.95 | 10.43 | 11.56 | 12.56 | 12.63 |
| Wnk4          | 0.23 | 8.02 | 0.48 | 2.10 | 6.789 | 7.833 | 8.881 | 7.81  |
| 4930553M18Rik | 0.24 | 7.16 | 0.58 | 2.50 | 8.611 | 9.398 | 10.68 | 9.361 |
| 8430408G22Rik | 0.24 | 8.02 | 0.62 | 2.27 | 8.524 | 9.224 | 10.57 | 9.39  |
| LOC280487     | 0.25 | 7.16 | 0.60 | 2.36 | 9.781 | 10.51 | 11.81 | 10.57 |
| Slpi          | 0.25 | 8.02 | 0.67 | 0.90 | 9.574 | 10.16 | 11.55 | 11.71 |
| Gstm6         | 0.26 | 8.02 | 0.30 | 1.61 | 7.442 | 9.176 | 9.364 | 8.675 |
| 1190020J12Rik | 0.27 | 8.02 | 1.03 | 1.19 | 11.7  | 11.66 | 13.58 | 13.33 |
| Vldlr         | 0.28 | 7.16 | 0.22 | 1.00 | 8.215 | 10.43 | 10.08 | 10.08 |
| Tmem25        | 0.28 | 8.02 | 0.81 | 1.48 | 6.558 | 6.859 | 8.404 | 7.842 |
| Gstm1         | 0.28 | 8.02 | 0.24 | 1.30 | 8.05  | 10.11 | 9.863 | 9.49  |
| Tm7sf2        | 0.29 | 8.02 | 0.58 | 1.17 | 6.636 | 7.419 | 8.421 | 8.191 |
| Hist1h2ae     | 0.31 | 2.22 | 0.53 | 1.22 | 6.973 | 7.897 | 8.684 | 8.399 |
| LOC270017     | 0.32 | 8.02 | 0.64 | 1.64 | 7.834 | 8.483 | 9.465 | 8.749 |
| LOC213480     | 0.33 | 8.02 | 0.51 | 1.30 | 9.768 | 10.74 | 11.37 | 10.99 |
| 2310047D13Rik | 0.33 | 8.02 | 0.40 | 0.90 | 12.64 | 13.95 | 14.22 | 14.38 |
| C730023J07Rik | 0.34 | 8.32 | 0.58 | 0.56 | 7.451 | 8.227 | 9.022 | 9.853 |
| H3f3b         | 0.35 | 8.02 | 0.96 | 1.12 | 7.763 | 7.815 | 9.266 | 9.105 |
| BC021614      | 0.35 | 8.02 | 0.45 | 0.91 | 7.024 | 8.179 | 8.533 | 8.663 |
| Pof1b         | 0.35 | 8.02 | 0.73 | 0.73 | 11.27 | 11.73 | 12.78 | 13.24 |
| Aldh5a1       | 0.35 | 8.02 | 0.43 | 1.02 | 9.764 | 10.99 | 11.27 | 11.24 |
| LOC384593     | 0.35 | 8.32 | 0.69 | 0.96 | 5.516 | 6.044 | 7.28  | 7.346 |
| Mycl1         | 0.35 | 8.32 | 0.77 | 0.91 | 7.489 | 7.861 | 8.984 | 9.117 |

# Supplementary Table S3 Continued 3

|               |      |      |      |      |       |       |       |       |
|---------------|------|------|------|------|-------|-------|-------|-------|
| Vldlr         | 0.36 | 8.02 | 0.26 | 0.93 | 6.904 | 8.821 | 8.369 | 8.48  |
| Mapk13        | 0.36 | 8.02 | 0.72 | 1.28 | 9.413 | 9.879 | 10.9  | 10.54 |
| LOC386380     | 0.37 | 8.02 | 0.71 | 1.16 | 6.844 | 7.343 | 8.278 | 8.07  |
| LOC381578     | 0.37 | 8.02 | 0.60 | 1.30 | 5.955 | 6.691 | 7.386 | 7.011 |
| 9626953_200   | 0.37 | 8.62 | 0.65 | 1.77 | 6.682 | 7.298 | 8.122 | 7.299 |
| Liph          | 0.37 | 8.62 | 1.03 | 1.38 | 9.457 | 9.414 | 10.91 | 10.45 |
| Bag2          | 0.38 | 8.02 | 0.61 | 1.59 | 8.34  | 9.056 | 9.754 | 9.088 |
| Odz3          | 0.38 | 8.32 | 0.31 | 0.96 | 6.322 | 7.997 | 7.723 | 7.781 |
| 4922503N01Rik | 0.38 | 8.62 | 0.59 | 1.07 | 7.198 | 7.957 | 8.606 | 8.507 |
| 2310022M17Rik | 0.39 | 7.16 | 0.45 | 0.92 | 5.68  | 6.84  | 7.038 | 7.164 |
| S100a16       | 0.39 | 8.02 | 0.87 | 1.26 | 10.42 | 10.62 | 11.76 | 11.43 |
| Mgst2         | 0.39 | 8.02 | 0.47 | 1.09 | 10.37 | 11.47 | 11.72 | 11.6  |
| LOC671641     | 0.39 | 8.02 | 0.97 | 1.11 | 6.698 | 6.742 | 8.057 | 7.906 |
| Dnajc19       | 0.39 | 8.32 | 0.56 | 1.08 | 6.01  | 6.854 | 7.359 | 7.247 |
| Rpl22l1       | 0.39 | 8.62 | 0.93 | 0.98 | 8.25  | 8.356 | 9.626 | 9.66  |
| 2310045L10Rik | 0.4  | 8.02 | 0.37 | 1.04 | 6.025 | 7.462 | 7.344 | 7.284 |
| Chdh          | 0.4  | 8.02 | 0.41 | 1.02 | 6.413 | 7.689 | 7.73  | 7.696 |
| Evpl          | 0.4  | 8.02 | 0.61 | 1.13 | 9.696 | 10.42 | 11.01 | 10.84 |
| 4930583H14Rik | 0.4  | 8.02 | 0.34 | 1.23 | 9.667 | 11.22 | 10.98 | 10.68 |
| Rbp2          | 0.4  | 8.62 | 0.77 | 0.71 | 8.889 | 9.274 | 10.2  | 10.7  |
| B230322F03Rik | 0.41 | 7.16 | 0.77 | 1.08 | 6.518 | 6.898 | 7.812 | 7.707 |
| Dnajb4        | 0.41 | 7.16 | 0.57 | 0.85 | 6.062 | 6.865 | 7.346 | 7.583 |
| LOC100047252  | 0.41 | 8.02 | 0.65 | 1.30 | 6.754 | 7.376 | 8.045 | 7.662 |
| EG384596      | 0.41 | 8.02 | 1.04 | 0.94 | 6.66  | 6.609 | 7.932 | 8.028 |
| Dera          | 0.42 | 7.16 | 0.56 | 1.06 | 6.675 | 7.51  | 7.915 | 7.827 |
| Apitd1        | 0.42 | 8.02 | 0.56 | 1.17 | 7.167 | 8.014 | 8.417 | 8.185 |
| LOC100047670  | 0.42 | 8.32 | 0.67 | 0.89 | 6.029 | 6.604 | 7.281 | 7.449 |
| Cnfn          | 0.42 | 8.62 | 0.90 | 1.09 | 12.89 | 13.05 | 14.14 | 14.02 |
| Fkbp5         | 0.43 | 7.16 | 0.65 | 1.27 | 8.286 | 8.901 | 9.51  | 9.169 |
| 9530096D07Rik | 0.43 | 7.16 | 0.52 | 0.85 | 5.584 | 6.53  | 6.801 | 7.037 |
| 9530058B02Rik | 0.43 | 8.02 | 0.49 | 1.11 | 7.512 | 8.55  | 8.74  | 8.592 |
| LOC637711     | 0.43 | 8.02 | 0.58 | 1.12 | 6.667 | 7.442 | 7.897 | 7.732 |
| 9430083A17Rik | 0.43 | 8.32 | 0.75 | 1.33 | 6.839 | 7.262 | 8.073 | 7.658 |
| LOC100047226  | 0.43 | 8.62 | 0.98 | 1.33 | 10    | 10.03 | 11.24 | 10.83 |
| 5133400G04Rik | 0.43 | 8.62 | 0.52 | 1.20 | 7.956 | 8.892 | 9.178 | 8.909 |
| Rpl4          | 0.44 | 7.16 | 0.71 | 0.96 | 6.653 | 7.15  | 7.826 | 7.884 |
| EG333830      | 0.44 | 8.32 | 0.83 | 1.08 | 7.005 | 7.276 | 8.194 | 8.08  |
| Kcnrg         | 0.44 | 8.32 | 0.51 | 0.96 | 7.456 | 8.418 | 8.638 | 8.703 |
| Dusp14        | 0.44 | 8.62 | 0.84 | 1.11 | 9.893 | 10.15 | 11.08 | 10.93 |
| EG666668      | 0.45 | 8.02 | 1.05 | 1.45 | 6.811 | 6.746 | 7.957 | 7.418 |
| LOC100044194  | 0.45 | 8.02 | 0.54 | 1.02 | 9.52  | 10.42 | 10.67 | 10.64 |
| Hmox1         | 0.45 | 8.32 | 0.66 | 0.91 | 10.93 | 11.54 | 12.1  | 12.24 |
| Per1          | 0.45 | 8.32 | 0.93 | 1.16 | 7.519 | 7.616 | 8.664 | 8.456 |
| Il17rc        | 0.45 | 8.32 | 0.52 | 1.00 | 8.116 | 9.052 | 9.263 | 9.263 |
| Ppl           | 0.46 | 8.32 | 0.97 | 0.95 | 11.84 | 11.89 | 12.95 | 13.02 |
| Rab10         | 0.46 | 8.32 | 0.66 | 1.20 | 7.418 | 8.026 | 8.541 | 8.284 |
| 1700022J01Rik | 0.47 | 7.16 | 0.72 | 1.02 | 6.141 | 6.623 | 7.227 | 7.197 |
| Macrocl1      | 0.47 | 8.02 | 0.65 | 0.89 | 6.873 | 7.499 | 7.948 | 8.118 |
| Ppl           | 0.47 | 8.02 | 0.97 | 1.04 | 12.32 | 12.36 | 13.42 | 13.36 |
| Dusp22        | 0.47 | 8.02 | 0.71 | 0.85 | 7.851 | 8.338 | 8.951 | 9.188 |
| 9530048O09Rik | 0.47 | 8.02 | 0.55 | 1.30 | 5.96  | 6.818 | 7.061 | 6.681 |
| D030022P06Rik | 0.47 | 8.32 | 0.86 | 0.95 | 9.686 | 9.898 | 10.76 | 10.84 |
| Nlr1          | 0.47 | 8.32 | 0.57 | 1.45 | 7.269 | 8.079 | 8.355 | 7.818 |
| Rps19         | 0.47 | 8.62 | 0.68 | 1.57 | 6.701 | 7.266 | 7.796 | 7.148 |
| LOC216036     | 0.48 | 8.02 | 0.99 | 1.15 | 6.95  | 6.965 | 8.007 | 7.801 |

# Supplementary Table S3 Continued 4

|               |      |      |      |      |       |       |       |       |
|---------------|------|------|------|------|-------|-------|-------|-------|
| LOC668837     | 0.48 | 8.02 | 1.04 | 1.17 | 8.21  | 8.157 | 9.266 | 9.037 |
| Car13         | 0.48 | 8.02 | 0.64 | 1.06 | 12.17 | 12.81 | 13.24 | 13.16 |
| Naprt1        | 0.48 | 8.02 | 0.37 | 0.82 | 9.928 | 11.38 | 11    | 11.28 |
| LOC100047173  | 0.48 | 8.62 | 0.70 | 0.90 | 10.02 | 10.54 | 11.09 | 11.25 |
| Evpl          | 0.49 | 8.02 | 0.66 | 1.10 | 12.48 | 13.07 | 13.52 | 13.38 |
| EG329521      | 0.49 | 8.32 | 1.02 | 1.41 | 8.149 | 8.121 | 9.172 | 8.674 |
| EG384525      | 0.49 | 8.32 | 0.94 | 1.26 | 9.832 | 9.922 | 10.86 | 10.53 |
| EG633570      | 0.49 | 8.62 | 0.97 | 1.16 | 6.776 | 6.826 | 7.816 | 7.605 |
| Al118078      | 0.49 | 9.7  | 0.52 | 0.87 | 7.037 | 7.987 | 8.063 | 8.256 |
| Olfra438      | 0.5  | 8.02 | 0.68 | 1.09 | 5.91  | 6.457 | 6.912 | 6.786 |
| Fancl         | 0.5  | 8.02 | 0.61 | 1.11 | 6.752 | 7.466 | 7.742 | 7.588 |
| LOC245676     | 0.5  | 8.32 | 1.05 | 1.14 | 8.598 | 8.533 | 9.602 | 9.412 |
| Lrrc20        | 0.5  | 8.32 | 0.45 | 0.92 | 6.525 | 7.663 | 7.535 | 7.659 |
| Ahnak         | 0.5  | 8.62 | 0.68 | 1.08 | 10.64 | 11.2  | 11.65 | 11.54 |
| Bloc1s3       | 0.5  | 9.7  | 0.80 | 1.37 | 6.426 | 6.749 | 7.411 | 6.96  |
| Nudt8         | 0.51 | 8.02 | 0.70 | 1.27 | 8.869 | 9.382 | 9.842 | 9.501 |
| LOC633945     | 0.51 | 8.32 | 1.37 | 1.58 | 8.568 | 8.119 | 9.538 | 8.875 |
| LOC383850     | 0.51 | 8.62 | 0.77 | 1.12 | 6.941 | 7.311 | 7.921 | 7.762 |
| Pdcd4         | 0.51 | 8.62 | 1.13 | 1.12 | 7.213 | 7.042 | 8.173 | 8.011 |
| Slc16a6       | 0.51 | 8.62 | 0.64 | 0.97 | 8.72  | 9.369 | 9.683 | 9.734 |
| Sugt1         | 0.51 | 8.62 | 0.67 | 1.06 | 6.076 | 6.664 | 7.061 | 6.981 |
| Eif3m         | 0.51 | 8.62 | 0.85 | 1.13 | 6.964 | 7.197 | 7.927 | 7.751 |
| Rpl14         | 0.52 | 8.02 | 0.70 | 1.14 | 6.907 | 7.417 | 7.857 | 7.672 |
| G6pdx         | 0.52 | 8.02 | 0.72 | 1.13 | 9.431 | 9.907 | 10.38 | 10.21 |
| Avpi1         | 0.52 | 8.02 | 0.65 | 0.83 | 10.75 | 11.38 | 11.7  | 11.97 |
| Egfr          | 0.52 | 8.02 | 0.79 | 0.98 | 7.993 | 8.338 | 8.945 | 8.975 |
| LOC435912     | 0.52 | 8.02 | 0.87 | 1.35 | 7.183 | 7.381 | 8.122 | 7.689 |
| Grhl1         | 0.52 | 8.32 | 0.87 | 0.92 | 10.81 | 11.01 | 11.74 | 11.86 |
| C78339        | 0.52 | 8.62 | 0.91 | 1.00 | 9.551 | 9.687 | 10.48 | 10.48 |
| LOC675985     | 0.52 | 8.62 | 1.08 | 1.31 | 9.682 | 9.566 | 10.64 | 10.25 |
| Reep6         | 0.52 | 8.62 | 0.90 | 1.18 | 8.487 | 8.638 | 9.417 | 9.184 |
| Asah3l        | 0.53 | 8.02 | 0.83 | 1.05 | 9.096 | 9.371 | 10.02 | 9.956 |
| Ccdc5         | 0.53 | 8.32 | 0.72 | 1.10 | 8.162 | 8.64  | 9.084 | 8.941 |
| LOC625752     | 0.53 | 8.32 | 0.71 | 1.12 | 6.925 | 7.422 | 7.829 | 7.669 |
| Perld1        | 0.53 | 8.32 | 0.85 | 1.17 | 6.405 | 6.634 | 7.331 | 7.11  |
| Gata4         | 0.53 | 8.32 | 0.78 | 1.01 | 6.802 | 7.152 | 7.729 | 7.72  |
| EG434404      | 0.53 | 8.62 | 0.93 | 1.34 | 10.76 | 10.87 | 11.68 | 11.26 |
| Entpd5        | 0.53 | 8.62 | 0.61 | 1.01 | 8.681 | 9.389 | 9.607 | 9.591 |
| ldh3a         | 0.54 | 8.32 | 0.83 | 1.65 | 6.346 | 6.613 | 7.245 | 6.52  |
| Ada           | 0.54 | 8.32 | 0.50 | 0.81 | 7.013 | 8.003 | 7.914 | 8.227 |
| Gpr89         | 0.54 | 8.32 | 0.60 | 1.32 | 5.945 | 6.683 | 6.832 | 6.428 |
| Ndg2          | 0.54 | 8.62 | 0.61 | 1.01 | 10.72 | 11.43 | 11.62 | 11.61 |
| Abhd2         | 0.54 | 8.62 | 1.10 | 1.25 | 7.879 | 7.738 | 8.76  | 8.442 |
| Epn3          | 0.55 | 8.02 | 0.63 | 1.27 | 6.678 | 7.34  | 7.531 | 7.19  |
| LOC100042815  | 0.55 | 8.32 | 0.79 | 1.42 | 5.997 | 6.34  | 6.865 | 6.356 |
| 2310022K01Rik | 0.55 | 8.62 | 0.63 | 1.20 | 5.893 | 6.557 | 6.764 | 6.504 |
| Ndufa5        | 0.55 | 9.7  | 0.73 | 0.93 | 7.646 | 8.104 | 8.504 | 8.606 |
| LOC545487     | 0.55 | 9.7  | 1.04 | 1.06 | 10.04 | 9.98  | 10.89 | 10.81 |
| Abcd4         | 0.56 | 8.02 | 0.63 | 1.40 | 6.919 | 7.578 | 7.757 | 7.273 |
| Rps24         | 0.56 | 8.32 | 0.68 | 1.04 | 10.48 | 11.04 | 11.31 | 11.26 |
| LOC100045117  | 0.56 | 8.62 | 0.83 | 1.22 | 6.567 | 6.841 | 7.392 | 7.104 |
| Arrdc3        | 0.56 | 8.62 | 0.74 | 1.04 | 10.25 | 10.69 | 11.07 | 11.02 |
| LOC381330     | 0.56 | 8.62 | 0.78 | 1.24 | 5.982 | 6.344 | 6.827 | 6.511 |
| LOC218060     | 0.56 | 9.7  | 0.84 | 1.01 | 6.838 | 7.093 | 7.667 | 7.659 |

# Supplementary Table S3 Continued 5

|               |             |      |      |      |       |       |       |       |
|---------------|-------------|------|------|------|-------|-------|-------|-------|
| Mapkapk3      | <b>0.57</b> | 8.02 | 0.76 | 1.01 | 9.903 | 10.3  | 10.7  | 10.68 |
| 2010003O02Rik | <b>0.57</b> | 8.02 | 1.02 | 1.09 | 6.394 | 6.36  | 7.206 | 7.084 |
| Acat1         | <b>0.57</b> | 8.32 | 0.86 | 0.99 | 6.642 | 6.867 | 7.456 | 7.471 |
| 2810425O13Rik | <b>0.57</b> | 8.62 | 0.88 | 1.18 | 8.068 | 8.248 | 8.891 | 8.647 |
| LOC630127     | <b>0.57</b> | 8.62 | 0.75 | 0.98 | 5.675 | 6.097 | 6.475 | 6.499 |
| 9830147N24Rik | <b>0.57</b> | 9.7  | 0.96 | 1.11 | 5.551 | 5.61  | 6.35  | 6.199 |
| Rab24         | <b>0.58</b> | 8.02 | 0.62 | 1.05 | 10.58 | 11.27 | 11.37 | 11.3  |
| Lsm12         | <b>0.58</b> | 8.32 | 0.77 | 1.20 | 8.367 | 8.737 | 9.145 | 8.886 |
| Msh2          | <b>0.58</b> | 8.32 | 1.00 | 1.22 | 7.059 | 7.062 | 7.852 | 7.564 |
| Ccdc114       | <b>0.58</b> | 8.32 | 0.79 | 1.29 | 6.684 | 7.022 | 7.475 | 7.104 |
| Pdlim2        | <b>0.58</b> | 8.62 | 0.61 | 0.97 | 8.063 | 8.775 | 8.837 | 8.878 |
| Vti1a         | <b>0.59</b> | 8.02 | 0.78 | 1.19 | 9.516 | 9.871 | 10.28 | 10.03 |
| Etfb          | <b>0.59</b> | 8.02 | 0.67 | 1.11 | 11.78 | 12.35 | 12.55 | 12.4  |
| Atp5e         | <b>0.59</b> | 8.32 | 1.22 | 1.07 | 7.535 | 7.245 | 8.308 | 8.213 |
| LOC667269     | <b>0.59</b> | 8.32 | 0.84 | 1.06 | 8.266 | 8.51  | 9.032 | 8.942 |
| Adck4         | <b>0.59</b> | 8.62 | 0.65 | 0.95 | 7.623 | 8.253 | 8.377 | 8.459 |
| LOC627317     | <b>0.59</b> | 9.7  | 0.85 | 1.20 | 11.26 | 11.49 | 12.03 | 11.77 |
| LOC434127     | <b>0.6</b>  | 8.32 | 1.24 | 1.04 | 9.031 | 8.719 | 9.774 | 9.719 |
| Arfp2         | <b>0.6</b>  | 8.32 | 0.91 | 1.14 | 8.056 | 8.198 | 8.8   | 8.617 |
| LOC384315     | <b>0.6</b>  | 8.62 | 0.80 | 1.41 | 7.316 | 7.645 | 8.048 | 7.554 |
| Fahd2a        | <b>0.6</b>  | 8.62 | 0.69 | 0.89 | 7.871 | 8.408 | 8.618 | 8.79  |
| 1810046J19Rik | <b>0.61</b> | 8.32 | 0.80 | 1.12 | 12.92 | 13.24 | 13.63 | 13.47 |
| Snf8          | <b>0.61</b> | 8.32 | 0.89 | 1.08 | 9.056 | 9.221 | 9.762 | 9.652 |
| Ubl4          | <b>0.61</b> | 8.32 | 0.86 | 1.06 | 11.28 | 11.5  | 12.01 | 11.93 |
| Rab3d         | <b>0.61</b> | 8.62 | 0.84 | 1.04 | 11.31 | 11.56 | 12.02 | 11.97 |
| Smyd5         | <b>0.61</b> | 9.7  | 0.66 | 1.44 | 6.682 | 7.278 | 7.4   | 6.874 |
| Mrpl36        | <b>0.62</b> | 8.32 | 0.74 | 1.07 | 9.1   | 9.543 | 9.801 | 9.707 |
| LOC672474     | <b>0.62</b> | 8.32 | 0.71 | 1.09 | 11.42 | 11.91 | 12.1  | 11.97 |
| Mapk3         | <b>0.63</b> | 8.32 | 0.90 | 1.29 | 9.213 | 9.373 | 9.874 | 9.504 |
| Vdac3         | <b>0.63</b> | 8.62 | 0.87 | 1.19 | 7.414 | 7.616 | 8.079 | 7.823 |
| Cdc42ep4      | <b>0.63</b> | 8.62 | 0.63 | 0.96 | 9.25  | 9.925 | 9.924 | 9.978 |
| Pccb          | <b>0.63</b> | 8.62 | 0.86 | 0.94 | 7.571 | 7.79  | 8.228 | 8.318 |
| Tmem107       | <b>0.64</b> | 8.32 | 0.96 | 1.19 | 7.31  | 7.366 | 7.944 | 7.698 |
| Rps3a         | <b>0.65</b> | 8.02 | 0.91 | 1.03 | 13.22 | 13.36 | 13.84 | 13.8  |
| Ard1          | <b>0.65</b> | 8.62 | 0.73 | 1.13 | 12    | 12.46 | 12.63 | 12.46 |
| A230066D03Rik | <b>0.65</b> | 9.7  | 0.81 | 1.07 | 7.054 | 7.353 | 7.677 | 7.585 |
| LOC668038     | <b>0.65</b> | 9.7  | 1.00 | 1.10 | 12.13 | 12.13 | 12.75 | 12.61 |
| 1810043H04Rik | <b>0.67</b> | 8.62 | 0.94 | 1.11 | 9.436 | 9.527 | 10.02 | 9.873 |

**Supplementary Table 4: Genes expressed in carcinomas after Sustained LY2109761 Treatment only or after Short Term LY2109761 Treatment only**

| <b>A Present only in Sustained:</b> |                               | <b>B Present only in Short Term:</b> |                               |
|-------------------------------------|-------------------------------|--------------------------------------|-------------------------------|
| <b>Gene Name</b>                    | <b>Mean Expression (log2)</b> | <b>Gene Name</b>                     | <b>Mean Expression (log2)</b> |
| Lgr6                                | 8.01                          | 2300002M23Rik                        | 8.77                          |
| Rbpj                                | 7.48                          | Amhr2                                | 6.99                          |
| C230081A13Rik                       | 6.89                          | 2310047D13Rik                        | 6.86                          |
| Jcam2                               | 6.62                          | Wdr92                                | 6.69                          |
| B430203G13Rik                       | 6.57                          | 2510049J12Rik                        | 6.57                          |
| 2700029L08Rik                       | 6.54                          | Kcnj15                               | 6.55                          |
| A730089E01Rik                       | 6.47                          | 2810032G03Rik                        | 6.42                          |
| AI504432                            | 6.45                          | LOC380925                            | 5.82                          |
| 4833418A01Rik                       | 6.43                          | AB114826                             | 5.72                          |
| LOC676640                           | 6.42                          | Olfr94                               | 5.69                          |
| Zfp346                              | 6.4                           |                                      |                               |
| 2900002H16Rik                       | 6.37                          |                                      |                               |
| Frmd4a                              | 6.36                          |                                      |                               |
| Rnf165                              | 6.33                          |                                      |                               |
| Baz1b                               | 6.32                          |                                      |                               |
| C530005A01Rik                       | 6.3                           |                                      |                               |
| 2610109H07Rik                       | 6.29                          |                                      |                               |
| 2410089E03Rik                       | 6.27                          |                                      |                               |
| LOC667370                           | 6.26                          |                                      |                               |
| Cdkl5                               | 6.24                          |                                      |                               |
| C130075H21Rik                       | 6.22                          |                                      |                               |
| Mobkl2b                             | 6.15                          |                                      |                               |
| D330008G18Rik                       | 6.14                          |                                      |                               |
| Bmp2k                               | 6.03                          |                                      |                               |
| 1600014C10Rik                       | 6.02                          |                                      |                               |
| D430045C01Rik                       | 6.01                          |                                      |                               |
| Chd9                                | 6                             |                                      |                               |
| Med15                               | 5.99                          |                                      |                               |
| E130314P11Rik                       | 5.96                          |                                      |                               |
| Map3k2                              | 5.91                          |                                      |                               |
| LOC100044275                        | 5.91                          |                                      |                               |
| 3110033D18Rik                       | 5.9                           |                                      |                               |
| Zfp69                               | 5.9                           |                                      |                               |
| 4631410M14Rik                       | 5.89                          |                                      |                               |
| Msx1                                | 5.88                          |                                      |                               |
| LOC672342                           | 5.88                          |                                      |                               |
| Gm1276                              | 5.87                          |                                      |                               |
| 9430081I23Rik                       | 5.87                          |                                      |                               |

## Supplementary Table S4 Continued

### Present only in Sustained

|                  |      |
|------------------|------|
| Adc              | 5.87 |
| scl0002711.1_76  | 5.86 |
| Rasa4            | 5.86 |
| Slc23a1          | 5.86 |
| 5330421C15Rik    | 5.86 |
| LOC100044529     | 5.84 |
| Ctxn1            | 5.84 |
| Sag              | 5.83 |
| D930007M16Rik    | 5.83 |
| Ubr1             | 5.82 |
| E430014L09Rik    | 5.8  |
| Pgm3             | 5.79 |
| Rps6ka2          | 5.77 |
| Cdan1            | 5.76 |
| B230209J16Rik    | 5.72 |
| A230069K02Rik    | 5.7  |
| Frmpr4           | 5.7  |
| LOC383067        | 5.68 |
| C87499           | 5.67 |
| Vars             | 5.67 |
| Ankrd17          | 5.65 |
| B230206P06Rik    | 5.65 |
| Megf10           | 5.65 |
| scl0002388.1_41  | 5.64 |
| Aifm2            | 5.63 |
| LOC381168        | 5.62 |
| 9130416J18Rik    | 5.62 |
| Ttll3            | 5.61 |
| KIF3B            | 5.6  |
| scl0004209.1_534 | 5.59 |
| A630050F23Rik    | 5.57 |
| 4930579K19Rik    | 5.56 |
| Ebf              | 5.56 |
| 1700085B03Rik    | 5.54 |
| Zfp385           | 5.5  |
| 6330537M06Rik    | 5.48 |
| A630086P05Rik    | 5.44 |
| Ddx23            | 5.37 |



**Supplementary Table S5: Delocalization of E-cadherin in chemically-induced carcinomas following long term LY2109761 treatment**

|                        |           | <b>#Mice</b> | <b>Delocalization</b> | <b>Partial Delocalization</b> | <b>Membrane Associated</b> |
|------------------------|-----------|--------------|-----------------------|-------------------------------|----------------------------|
| <b>Sustained Exp 1</b> | LY2109761 | 8            | 4(50%)                | 3(38%)                        | 1(12%)                     |
|                        | Vehicle   | 8            | 0                     | 0                             | 8(100%)                    |
| <b>Short Term</b>      | LY2109761 | 5            | 0                     | 1(20%)                        | 4(80%)                     |
|                        | Vehicle   | 7            | 0                     | 0                             | 7(100%)                    |
